# Supplementary material for: The relationship between renal function indicators and preeclampsia in the second trimester of pregnancy: a retrospective study
Source: PeerJ. 2025 Feb 28;13:e19027. doi: 10.7717/peerj.19027 (PMC11874948; doi:10.7717/peerj.19027)
Supplement: Supplemental Information 1 [file peerj-13-19027-s001.xlsx]

## Sheet: Total
age	History of hypertension (0 no; 1 yes; 2 pregnancy hypertension)	Family history of hypertension	Preconception BMI	Method of delivery (1 natural delivery; 2 Cesarean section; 3 Midwifery)	Newborn sex (1 boy, 2 girls)	Newborn weight (g)	Gestational weeks	Preterm birth earlier than 34 weeks (0 no 1 Yes)	Preterm birth earlier than 37 weeks (0 no 1 yes)	Newborn length (cm)	Whether the newborn is admitted to the neonatal department (0 no, 1 yes)	Adverse neonatal delivery outcomes (0 No 1 Yes)	Small for gestational age (0 no; 1 yes)	Respiratory distress syndrome (0 no; 1 yes)	Intracranial hemorrhage (0 no; 1 yes)	Neonatal infection (0 no; 1 yes)	Neonatal asphyxia (0 no; 1 yess)	First labor (0 first labor 1 postpartum)	Adverse maternal delivery outcomes (0 No 1 Yes)	Retinal detachment (0 No 1 Yes)	Placental abruption (0 no 1 yes)	HELLP syndrome (0 No 1 Yes)	Postpartum hemorrhage (0 No 1 Yes)	Group (0 control; 1 Preeclampsia)	Second trimester check gestational week	Second trimester urea nitrogen (mmolL)	Second trimester creatinine (μmolL)	Second trimester uric acid (μmolL)	Match_G
33.2904	0	0	21.7555	1	1	2840	39.2857	0	0	49	0	0	0	0	0	0	0	1	0	0	0	0	0	0	24.8571	1.9	37.6	192	25679698
32.6575	0	0	25.7117	1	1	3900	40	0	0	51	0	0	0	0	0	0	0	1	0	0	0	0	0	0	27	3.5	47.6	284	-1298087972
34.0082	0	0	25.6312	1	1	3200	39.7143	0	0	50	0	0	0	0	0	0	0	0	0	0	0	0	0	0	25.1429	2.3	46.1	340	768093760
30.5205	0	1	21.6713	2	1	2870	39.1429	0	0	49	0	0	0	0	0	0	0	1	0	0	0	0	0	0	27.4286	3.2	48.2	221	1844990703
25.9452	0	0	24.3531	1	2	3570	39.2857	0	0	50	0	0	0	0	0	0	0	1	0	0	0	0	0	0	26.8571	2.8	35.8	210	1496891661
26.9808	0	0	19.5312	2	1	3040	38.5714	0	0	50	0	0	0	0	0	0	0	0	0	0	0	0	0	0	24.8571	2.9	48.8	228	1596672970
30.4849	0	0	18.591	1	1	3800	39.1429	0	0	51	0	0	0	0	0	0	0	1	0	0	0	0	0	0	27.2857	3.3	42.1	187	-280558237
27.5342	0	0	30.4832	1	2	3430	40	0	0	50	0	0	0	0	0	0	0	0	0	0	0	0	0	0	26.1429	2.3	47.9	236	-460688390
35.4	0	0	24.1588	1	2	3750	38.1429	0	0	51	0	0	0	0	0	0	0	1	0	0	0	0	0	0	27	2.5	48.8	253	-973339127
33.337	0	0	27.5873	2	2	3940	39.5714	0	0	52	0	0	0	0	0	0	0	1	0	0	0	0	0	0	27.2857	3.8	54.1	299	-1698264513
26.3726	0	0	18.8189	2	1	3260	40	0	0	50	0	0	0	0	0	0	0	0	0	0	0	0	0	0	26.1429	2.1	44.5	171	-2093167442
29.8301	0	0	18.6115	1	2	2950	38.7143	0	0	50	0	0	0	0	0	0	0	0	0	0	0	0	0	0	25.5714	2.9	53.1	203	-1728566029
25.2959	0	0	20.0773	1	2	3450	41	0	0	50	0	0	0	0	0	0	0	1	0	0	0	0	0	0	24	2.9	49.8	228	843749834
28.3699	0	1	22.0386	2	1	3030	37.7143	0	0	49	0	0	0	0	0	0	0	1	0	0	0	0	0	0	27.4286	2	53.2	208	-1003353599
26.1671	0	0	20.3125	1	1	2750	39.5714	0	0	49	0	1	1	0	0	0	0	0	0	0	0	0	0	0	25	2.9	41.6	203	-752556533
28.2986	0	0	16.1616	1	1	3370	38	0	0	50	0	0	0	0	0	0	0	0	0	0	0	0	0	0	25	2.6	39.7	162	-977858487
37.5808	0	0	22.2656	1	1	3000	37.7143	0	0	50	0	0	0	0	0	0	0	1	0	0	0	0	0	0	26.4286	1.7	38.2	141	2007428952
32.0301	0	0	18.75	1	2	3290	40.1429	0	0	50	0	0	0	0	0	0	0	1	0	0	0	0	0	0	27.4286	2.9	48	205	979514646
31.0466	0	0	21.0772	1	2	2930	40	0	0	50	0	0	0	0	0	0	0	1	0	0	0	0	0	0	25.5714	3.6	43.9	162	78567373
28.3397	0	0	18.9036	1	1	2660	35.8571	0	1	49	1	1	0	0	1	0	0	0	0	0	0	0	0	0	25.8571	2.8	45.5	146	-516721618
28.589	0	0	19.2336	1	1	2550	39	0	0	49	0	1	1	0	0	0	0	0	0	0	0	0	0	0	25.1429	2.8	52.1	140	804596658
27.1288	0	1	22.0386	2	1	3750	38.1429	0	0	52	0	0	0	0	0	0	0	0	0	0	0	0	0	0	26.5714	2.1	43	229	2109092385
38.2192	0	0	21.048	2	1	3480	38.1429	0	0	51	0	0	0	0	0	0	0	1	0	0	0	0	0	0	26.4286	3.3	44.3	223	-446707200
30.0822	0	0	24.2188	1	1	3510	39.1429	0	0	51	0	0	0	0	0	0	0	0	0	0	0	0	0	0	26.2857	2.4	51.3	191	1532750793
34.1205	0	1	23.5304	2	1	3320	40.1429	0	0	50	0	0	0	0	0	0	0	0	0	0	0	0	0	0	22.2857	3.4	54.5	253	-931101003
26.4466	0	0	23.7118	2	2	3580	39.7143	0	0	49	0	0	0	0	0	0	0	0	0	0	0	0	0	0	25.7143	4.3	44.5	198	959724094
30.2904	0	0	18.5078	2	1	3500	39	0	0	50	0	0	0	0	0	0	0	0	0	0	0	0	0	0	26.1429	2.6	48.7	168	-1475304697
32.9671	0	0	22.1003	1	1	1800	32	1	1	30	1	1	0	1	0	0	0	0	0	0	0	0	0	0	25.4286	2.8	37	136	-693580662
28.1616	0	0	19.5717	1	2	3350	39.5714	0	0	50	0	0	0	0	0	0	0	0	0	0	0	0	0	0	26	2.2	38.8	150	728301358
27.3616	0	0	27.6817	1	1	3510	37.5714	0	0	51	0	0	0	0	0	0	0	0	0	0	0	0	0	0	25.1429	2.8	50.1	233	1506943257
38.2219	0	0	22.68	1	1	3350	38.2857	0	0	50	0	0	0	0	0	0	0	0	0	0	0	0	0	0	25.5714	3.2	51.6	162	277662208
28.3534	0	0	23.0518	1	1	3240	38.8571	0	0	50	0	0	0	0	0	0	0	0	0	0	0	0	0	0	25.2857	2.3	59.2	213	406925585
33.5616	0	0	19.487	2	1	2850	38.8571	0	0	50	0	0	0	0	0	0	0	1	1	0	1	0	0	0	24.8571	2.2	48.3	174	-1702866227
32.5836	0	1	20.7008	1	2	3340	39.1429	0	0	50	1	0	0	0	0	0	0	0	0	0	0	0	0	0	25.5714	2.1	49.7	242	-23277215
30.4082	0	0	22.8624	1	1	3750	39.7143	0	0	51	0	0	0	0	0	0	0	1	0	0	0	0	0	0	26.5714	3.6	48	249	1211776114
25.6137	0	0	30.863	1	1	3400	37.8571	0	0	50	0	0	0	0	0	0	0	0	0	0	0	0	0	0	25.1429	2.1	44.8	221	168017041
32.611	0	0	19.5312	2	1	3300	39.5714	0	0	49	0	0	0	0	0	0	0	1	0	0	0	0	0	0	27.7143	3.4	46.3	133	1926802117
26.737	0	1	18.6851	2	1	4150	39.2857	0	0	52	0	0	0	0	0	0	0	0	0	0	0	0	0	0	25.2857	2.7	45.5	184	-118713824
32.7945	0	0	23.8751	1	2	3900	40.5714	0	0	51	0	0	0	0	0	0	0	1	0	0	0	0	0	0	26	3.3	43.4	204	-1808148017
23.863	0	0	19.4674	1	2	3950	40.4286	0	0	51	1	1	0	0	1	0	0	0	0	0	0	0	0	0	26.4286	2.4	45	149	-1883302348
25.7397	0	0	18.424	1	2	3500	39.8571	0	0	51	0	0	0	0	0	0	0	0	0	0	0	0	0	0	26	2.8	35.7	191	-2056135902
30.6603	0	0	17.5781	1	2	3350	38.2857	0	0	50	0	0	0	0	0	0	0	1	0	0	0	0	0	0	26	3	48.3	170	-706776837
32.7233	0	0	23.8281	1	1	2750	39.7143	0	0	49	0	1	1	0	0	0	0	1	0	0	0	0	0	0	25.4286	1.9	45.4	172	1007465368
32.9041	0	0	24.8016	2	1	3400	38.4286	0	0	50	0	0	0	0	0	0	0	1	0	0	0	0	0	0	25.2857	3.1	50.7	189	1162240606
36.4795	0	0	22.4913	1	1	4090	39.5714	0	0	52	0	0	0	0	0	0	0	1	0	0	0	0	0	0	26.5714	3.5	48	169	-1898462082
27.6685	0	0	16.0037	2	2	2300	37.2857	0	0	47	0	1	1	0	0	0	0	0	0	0	0	0	0	0	24.5714	3.5	50.5	188	1029863539
27.6959	0	1	28.4005	1	2	3900	39.7143	0	0	51	0	0	0	0	0	0	0	0	0	0	0	0	0	0	25	1.3	40.5	168	-1964976312
33.4685	0	0	17.5781	1	2	2745	39.4286	0	0	50	0	1	1	0	0	0	0	0	0	0	0	0	0	0	25.8571	2.6	46.9	231	631905883
28.1205	0	1	19.4674	2	1	2990	38.7143	0	0	50	0	0	0	0	0	0	0	0	0	0	0	0	0	0	26.2857	2.5	43.9	104	876376567
34.5425	0	0	23.6095	2	1	2850	37.1429	0	0	49	0	0	0	0	0	0	0	1	0	0	0	0	0	0	27	4.7	58.3	187	193516704
33.1836	0	0	21.4536	2	2	3750	40.2857	0	0	50	0	0	0	0	0	0	0	0	0	0	0	0	0	0	26.5714	2.7	44.8	152	995062131
34.2658	0	0	22.6003	2	2	2750	38	0	0	49	0	0	0	0	0	0	0	1	0	0	0	0	0	0	25	1.9	46.3	173	-1534840141
32.9973	0	0	21.4844	1	1	3200	39.2857	0	0	50	0	0	0	0	0	0	0	0	0	0	0	0	0	0	27.1429	3.4	56.3	160	1306120083
26.8959	0	0	21.875	1	1	3930	39.4286	0	0	51	0	0	0	0	0	0	0	0	0	0	0	0	0	0	25.7143	2.2	52.9	173	-1636126949
27.9863	0	0	18.8189	1	2	3260	38.2857	0	0	50	0	0	0	0	0	0	0	1	0	0	0	0	0	0	27	3.1	33.6	155	1418081168
24.6438	0	0	23.1405	1	1	3050	36.8571	0	1	50	1	0	0	0	0	0	0	0	0	0	0	0	0	0	27.2857	4.1	52.4	216	-1942834497
29.3041	0	1	21.0938	2	2	3500	40.5714	0	0	51	0	0	0	0	0	0	0	0	0	0	0	0	0	0	27.8571	3.1	41.8	185	-131917651
28.0603	0	0	19.8347	2	2	3800	40.7143	0	0	51	0	0	0	0	0	0	0	0	0	0	0	0	0	0	27.2857	4.9	55.6	238	2135079288
33.7973	0	0	23.833	2	2	3250	39	0	0	50	0	0	0	0	0	0	0	0	0	0	0	0	0	0	26.7143	2.6	57.8	262	-408635875
37.3781	0	0	30.303	2	1	3150	38.4286	0	0	50	0	0	0	0	0	0	0	1	0	0	0	0	0	0	27.2857	2.4	40.6	179	-1273245579
28.3041	0	0	22.0386	1	2	2000	37.2857	0	0	46	1	1	1	0	0	0	0	0	0	0	0	0	0	0	26.1429	3.1	41.1	160	1384028324
32.4767	0	1	20.83	2	1	3540	38.5714	0	0	51	0	0	0	0	0	0	0	1	0	0	0	0	0	0	27.2857	2.7	46.9	132	-705127677
25.5671	0	0	18.75	2	1	2810	38.4286	0	0	49	0	0	0	0	0	0	0	0	0	0	0	0	0	0	27.1429	2.9	39.8	167	1090414865
27.7562	0	0	19.1406	1	2	3000	38.8571	0	0	50	0	0	0	0	0	0	0	0	0	0	0	0	0	0	25.2857	2.2	45.9	183	1816357289
27.2877	0	0	19.8141	1	1	2950	38.2857	0	0	50	0	0	0	0	0	0	0	0	0	0	0	0	0	0	27.7143	2.7	44.4	165	783367651
36.2	0	1	22.8624	1	2	3750	39.8571	0	0	51	0	0	0	0	0	0	0	1	0	0	0	0	0	0	22.7143	3.4	48.3	169	-2040742077
28.3863	0	0	24.5089	1	1	3820	39.2857	0	0	51	0	0	0	0	0	0	0	0	0	0	0	0	0	0	26.8571	2.8	51.6	238	1343022136
30.6055	0	1	28.578	1	1	3060	40.1429	0	0	50	0	0	0	0	0	0	0	1	0	0	0	0	0	0	25.5714	1.8	34.3	195	115864083
27.589	0	0	24.0238	1	1	3450	37.7143	0	0	50	0	0	0	0	0	0	0	0	0	0	0	0	0	0	25.1429	3.2	52.4	118	523893596
32.4	0	0	20.0046	1	1	3980	38	0	0	52	0	0	0	0	0	0	0	1	0	0	0	0	0	0	24.5714	2.7	45.2	190	-338955764
30.9781	0	0	22.8928	2	2	3480	40	0	0	50	0	0	0	0	0	0	0	0	0	0	0	0	0	0	26.1429	2	36.6	151	1139353730
27.5288	0	0	25.462	1	2	3100	40.1429	0	0	50	0	0	0	0	0	0	0	1	0	0	0	0	0	0	25.7143	2.9	46.8	230	1230981494
28.9151	0	1	20.202	1	2	2950	38.7143	0	0	50	0	0	0	0	0	0	0	0	0	0	0	0	0	0	26.4286	2.1	42.2	216	833216321
31.8712	0	0	18.7305	1	2	3370	40	0	0	50	0	0	0	0	0	0	0	0	0	0	0	0	0	0	26.5714	3.5	54.8	243	63912381
25.3397	0	0	19.721	2	1	2950	38.2857	0	0	48	0	0	0	0	0	0	0	0	0	0	0	0	0	0	26.2857	2.3	45.3	187	-2099981685
28.9945	0	1	22.8624	2	2	3440	41.5714	0	0	50	0	0	0	0	0	0	0	0	0	0	0	0	0	0	25.7143	3.1	49	252	69080322
30.7918	0	1	23.8754	2	2	3100	39	0	0	50	0	0	0	0	0	0	0	0	0	0	0	0	0	0	26.1429	2.8	53.2	273	1691652385
29.863	0	0	21.4533	1	2	3610	40	0	0	51	0	0	0	0	0	0	0	0	0	0	0	0	0	0	25.1429	2.7	50.9	186	1493428983
32.4877	0	0	24.0346	2	2	2930	38.7143	0	0	49	0	0	0	0	0	0	0	1	0	0	0	0	0	0	25.4286	4.5	47.4	207	1205689867
27.0438	0	0	17.1875	1	1	3100	39.7143	0	0	50	0	0	0	0	0	0	0	0	0	0	0	0	0	0	24.8571	2.4	51.6	217	-1867106834
34.3151	0	1	20.0288	2	1	3250	39	0	0	50	1	0	0	0	0	0	0	0	0	0	0	0	0	0	27.4286	1.7	48.6	129	1351456757
35.474	0	1	24.3418	1	1	3400	39.2857	0	0	50	0	0	0	0	0	0	0	0	0	0	0	0	0	0	27.7143	1.9	38.5	115	667338674
29.1068	0	0	21.3599	1	2	3750	41	0	0	51	0	0	0	0	0	0	0	0	0	0	0	0	0	0	26.5714	3.1	46.5	191	-56761802
26.063	0	0	21.7738	1	2	3700	41.1429	0	0	51	0	0	0	0	0	0	0	1	0	0	0	0	0	0	27.4286	2.2	58.8	190	-354835856
33.9233	0	0	23.7118	2	1	3250	38.7143	0	0	50	0	0	0	0	0	0	0	1	0	0	0	0	0	0	25.8571	1.8	49.9	146	192434179
29.6219	0	0	18.3655	1	2	2750	41	0	0	49	0	1	1	0	0	0	0	0	0	0	0	0	0	0	26.1429	4.2	48.6	255	-374128082
32.8932	0	0	30.116	2	1	3600	40	0	0	50	0	0	0	0	0	0	0	0	0	0	0	0	0	0	25.7143	1.6	44.2	174	2144545114
32.2247	0	0	20.7008	2	1	3100	40	0	0	50	0	0	0	0	0	0	0	1	0	0	0	0	0	0	26.1429	3.6	50.2	214	2063524242
31.5534	0	0	30.7958	2	2	3940	39.7143	0	0	51	0	0	0	0	0	0	0	0	0	0	0	0	0	0	26.4286	2.5	41.3	181	1174600160
27.4932	0	0	18.7328	1	2	3400	40.7143	0	0	51	0	0	0	0	0	0	0	0	0	0	0	0	0	0	26.7143	3.1	53.5	277	1155321307
33.9863	0	0	18.8707	1	1	3700	39.7143	0	0	51	0	0	0	0	0	0	0	0	0	0	0	0	0	0	27.5714	3.1	41.3	216	1105176763
30.2603	0	1	18.7783	1	1	3660	39.4286	0	0	51	0	0	0	0	0	0	0	0	0	0	0	0	0	0	26	4.1	49.7	191	-1103667995
26.9589	0	0	19.2894	1	2	3250	39.7143	0	0	50	0	0	0	0	0	0	0	0	0	0	0	0	0	0	27.2857	2.3	41.5	136	-301395191
29.5096	0	0	22.6003	2	2	3100	39	0	0	50	0	0	0	0	0	0	0	0	0	0	0	0	0	0	26.8571	2.9	41.6	104	273651998
27.4877	0	0	19.5312	1	1	3560	39	0	0	51	0	0	0	0	0	0	0	0	0	0	0	0	0	0	26.4286	2.8	38.5	251	-484474241
29.1973	0	1	17.8465	1	1	2950	39.2857	0	0	50	0	0	0	0	0	0	0	0	0	0	0	0	0	0	25.5714	3.3	42.4	156	-403990539
31.6986	0	1	24.3375	2	1	4400	39.8571	0	0	52	0	0	0	0	0	0	0	0	0	0	0	0	0	0	25.8571	3.1	40.1	192	-1366696629
27.8384	0	0	24.3046	1	1	4050	40.1429	0	0	51	0	0	0	0	0	0	0	0	0	0	0	0	0	0	26	3.3	56	269	186706034
30.5397	0	0	23.4221	2	1	3550	40	0	0	50	0	0	0	0	0	0	0	0	0	0	0	0	0	0	25.4286	2.1	40.5	164	-1595115669
39.1151	0	0	24.2215	2	2	2650	39	0	0	50	0	1	1	0	0	0	0	1	0	0	0	0	0	0	27.1429	3.1	62.3	225	-610066432
26.674	0	0	23.4375	2	2	3500	40.4286	0	0	50	0	0	0	0	0	0	0	0	0	0	0	0	0	0	26.4286	3.2	34.7	195	-2088459148
35.2247	0	0	22.8624	1	2	3330	39.5714	0	0	50	0	0	0	0	0	0	0	0	0	0	0	0	0	0	26	2.2	49.4	188	-1818399148
30.4493	0	0	24.0882	2	2	3200	37.2857	0	0	50	0	0	0	0	0	0	0	1	0	0	0	0	0	0	25	3.2	41.9	237	569261956
33.9671	0	1	24.1672	1	1	3400	39.2857	0	0	50	0	0	0	0	0	0	0	1	0	0	0	0	0	0	27.1429	2.3	51.1	183	1858008058
33.1671	0	0	26.6389	1	1	3150	37.5714	0	0	50	0	0	0	0	0	0	0	1	0	0	0	0	0	0	25	2.4	42.8	232	-1841324102
33.9589	0	0	23.4375	2	2	2900	38.7143	0	0	49	0	0	0	0	0	0	0	0	0	0	0	0	0	0	25.2857	2.9	40.7	161	1618653332
30.7342	0	0	23.7253	2	1	2400	36.7143	0	1	48	1	1	0	1	0	0	0	0	0	0	0	0	0	0	26.4286	3	55.5	265	-838655386
30.2795	0	0	19.5312	1	2	3540	39.1429	0	0	50	0	0	0	0	0	0	0	0	0	0	0	0	0	0	25.7143	2.9	45.7	208	-1309943333
31.2603	0	0	28.6501	1	1	2800	35.8571	0	1	47	1	0	0	0	0	0	0	1	0	0	0	0	0	0	24.8571	2.5	48.2	231	-1309383385
28.3534	0	0	18.7305	2	2	2900	38.1429	0	0	50	0	0	0	0	0	0	0	1	0	0	0	0	0	0	25.8571	2.7	52.1	202	1864861722
34.2685	0	0	25.2363	2	1	3050	38.4286	0	0	50	0	0	0	0	0	0	0	0	0	0	0	0	0	0	26.8571	2.8	48.8	292	-1121003587
33.0575	0	0	24.0882	1	1	3025	38.7143	0	0	50	0	0	0	0	0	0	0	1	0	0	0	0	0	0	27.1429	2.1	43.7	124	2126066040
27.8137	0	0	18.7328	2	1	3210	40	0	0	50	0	0	0	0	0	0	0	0	0	0	0	0	0	0	25.2857	3.4	40.6	223	656846128
35.3425	0	1	21.1203	2	1	3600	39.7143	0	0	50	0	0	0	0	0	0	0	1	0	0	0	0	0	0	25.4286	3.4	49.8	230	201065993
27.6301	0	0	18.4965	2	2	3350	39.7143	0	0	50	0	0	0	0	0	0	0	0	0	0	0	0	0	0	26	3	51.7	237	1695746053
33.063	0	0	23.8751	2	2	2750	36.7143	0	1	50	1	0	0	0	0	0	0	1	0	0	0	0	0	0	25	3.5	50	228	375825464
35.9233	0	1	25.1559	1	1	3650	39	0	0	51	0	0	0	0	0	0	0	1	0	0	0	0	0	0	26.4286	1.9	33.5	208	-2123257161
33.3096	0	1	22.0386	2	2	3160	39.2857	0	0	47	0	0	0	0	0	0	0	1	0	0	0	0	0	0	27.1429	2.1	43.6	179	1379732679
30.9644	0	1	19.8347	2	2	3230	39.4286	0	0	50	0	0	0	0	0	0	0	1	0	0	0	0	0	0	27	3.5	63.4	188	2019283585
27.0658	0	0	27.8852	2	1	4260	40.2857	0	0	53	0	0	0	0	0	0	0	0	0	0	0	0	0	0	25.8571	2.8	57	248	2071163123
27.6164	0	0	18.3594	1	2	2350	39.1429	0	0	49	0	1	1	0	0	0	0	0	0	0	0	0	0	0	25.5714	3.3	41.8	149	518492324
32.2192	0	1	21.2585	1	2	3060	39.8571	0	0	50	0	0	0	0	0	0	0	0	0	0	0	0	0	0	26.7143	2.3	56.7	198	-1600519771
25.589	0	0	22.8625	1	2	2950	39.7143	0	0	49	0	0	0	0	0	0	0	0	0	0	0	0	0	0	24.7143	2.9	76.1	230	287475469
31.2082	0	0	17.0562	1	2	3230	40	0	0	50	0	0	0	0	0	0	0	0	0	0	0	0	0	0	26.2857	1.9	45.4	144	-532215214
24.5781	0	0	24.0346	2	1	3910	39.5714	0	0	52	0	0	0	0	0	0	0	0	0	0	0	0	0	0	26.7143	2.7	44.3	192	840755493
30.7973	0	1	18.8189	1	1	3050	39.2857	0	0	50	0	0	0	0	0	0	0	0	0	0	0	0	0	0	26.2857	2.8	48.8	208	962351445
29.463	0	0	20.0773	1	1	3760	40.4286	0	0	51	0	0	0	0	0	0	0	0	0	0	0	0	0	0	24.2857	1.9	41.2	137	-509139964
27.0685	0	0	21.9671	1	2	3350	40.4286	0	0	50	0	0	0	0	0	0	0	0	0	0	0	0	0	0	24.7143	3.3	54.7	170	1723005669
32.6466	0	0	17.4747	2	2	2750	38.5714	0	0	50	0	0	0	0	0	0	0	1	0	0	0	0	0	0	25.8571	1.8	41.7	136	-213030306
38.4301	0	0	23.1405	1	2	3260	40	0	0	50	0	0	0	0	0	0	0	1	0	0	0	0	0	0	26.4286	2.6	59.9	238	1660822648
35.9863	0	0	34.6268	2	1	3450	38.4286	0	0	#NULL!	0	0	0	0	0	0	0	0	0	0	0	0	0	0	26.7143	2.9	49.2	272	429972077
31.8082	0	1	19.3625	1	2	2750	37.5714	0	0	50	0	0	0	0	0	0	0	0	0	0	0	0	0	0	25.2857	3.1	46.3	235	781058909
26.7918	0	0	19.2672	1	2	3850	39.5714	0	0	51	0	0	0	0	0	0	0	0	0	0	0	0	0	0	26	7.7	51.4	294	-62584132
24.2274	0	0	18.4265	1	1	2310	39.1429	0	0	48	0	1	1	0	0	0	0	0	0	0	0	0	0	0	27	2.5	42.9	173	-837610438
32.1699	0	0	21.7784	2	1	3590	39	0	0	51	0	0	0	0	0	0	0	1	0	0	0	0	0	0	27.1429	1.9	41.9	203	2104535339
32.7918	0	0	21.7738	1	1	2845	39.8571	0	0	49	0	0	0	0	0	0	0	0	1	0	0	0	1	0	25.7143	2.8	43.4	266	1318215523
34.9562	0	1	21.7738	1	2	3570	41.1429	0	0	51	0	0	0	0	0	0	0	1	0	0	0	0	0	0	25.8571	2.7	45.6	154	-321560938
33.1808	0	0	22.0317	2	1	2500	37.1429	0	0	50	0	0	0	0	0	0	0	0	0	0	0	0	0	1	24.8571	2.2	38.4	226	25679698
33.2986	0	1	24.2424	2	1	2420	36.2857	0	1	46	1	1	0	1	0	0	0	1	0	0	0	0	0	1	27.2857	2.6	39.5	180	-1298087972
33.9315	0	0	21.1073	2	1	2150	36.5714	0	1	45	1	1	1	1	0	0	0	0	0	0	0	0	0	1	25.1429	2.2	47.5	192	768093760
29.9068	1	1	25.9695	2	2	1200	29.8571	1	1	42	1	1	1	1	0	0	0	1	1	1	0	0	0	1	27.4286	1.8	38.4	268	1844990703
25.8466	0	0	22.8329	1	1	3140	40.2857	0	0	50	0	0	0	0	0	0	0	0	0	0	0	0	0	1	26.4286	1.2	29	159	1496891661
26.7699	0	0	22.1893	2	1	1350	33.7143	1	1	38	1	1	1	1	0	0	0	0	0	0	0	0	0	1	24.8571	3.7	45.4	218	1596672970
30.211	0	0	25.6369	2	1	2820	36.4286	0	1	48	1	1	0	1	0	0	0	0	0	0	0	0	0	1	27.1429	2.8	46	281	-280558237
26.8822	0	1	33.5938	2	2	3010	36.4286	0	1	49	1	1	0	0	1	0	0	0	0	0	0	0	0	1	25.8571	2.9	44.1	218	-460688390
35.9288	0	1	29.6427	2	1	2450	35.5714	0	1	48	1	1	0	0	1	0	0	1	0	0	0	0	0	1	27.2857	4.5	45.3	334	-973339127
33.3781	1	1	24.8358	2	2	1430	32.8571	1	1	39	1	1	1	1	0	1	0	1	0	0	0	0	0	1	26.8571	3.3	40.7	91	-1698264513
25.9918	0	0	18.5568	2	1	2750	36.1429	0	1	49	1	1	0	0	0	1	0	0	0	0	0	0	0	1	25.8571	1.7	51.9	174	-2093167442
29.811	0	1	22.4913	2	2	2900	37.7143	0	0	49	0	0	0	0	0	0	0	0	0	0	0	0	0	1	25.7143	3.8	50.8	236	-1728566029
26.074	0	1	28.3447	2	2	3270	37.4286	0	0	49	0	0	0	0	0	0	0	0	0	0	0	0	0	1	24	1.9	43.5	302	843749834
29.011	0	1	18.7305	1	2	2650	37.8571	0	0	49	0	0	0	0	0	0	0	1	0	0	0	0	0	1	27.8571	2.3	55.7	230	-1003353599
25.8301	0	1	21.3675	2	1	2650	35.7143	0	1	49	1	1	0	1	0	0	0	0	0	0	0	0	0	1	24.5714	3.7	44.5	203	-752556533
28.4822	0	1	20.3223	2	1	2000	33.8571	1	1	45	1	1	0	1	1	0	0	0	1	0	1	0	0	1	25.1429	3.4	43.1	209	-977858487
37.5041	1	1	22.2656	1	2	2850	39.7143	0	0	49	0	0	0	0	0	0	0	1	0	0	0	0	0	1	26.8571	3.2	52.2	201	2007428952
31.1342	0	0	21.3593	2	2	2730	39	0	0	46	0	0	0	0	0	0	0	0	0	0	0	0	0	1	27.5714	3.7	52.2	204	979514646
30.5452	0	0	31.6456	2	1	2520	35.4286	0	1	47	1	1	0	0	1	0	0	0	1	0	1	0	0	1	26	4.4	47.8	227	78567373
28.5699	0	1	23.4375	3	2	3100	40	0	0	50	0	0	0	0	0	0	0	0	1	0	0	0	1	1	25.7143	2.6	48.1	150	-516721618
28.0356	0	0	28.7109	2	1	2100	34.7143	0	1	46	1	1	0	1	0	0	0	0	1	0	0	1	0	1	25.4286	3.2	47.3	188	804596658
27.063	0	1	21.3599	2	1	3830	39.8571	0	0	53	0	0	0	0	0	0	0	0	0	0	0	0	0	1	26.4286	2.3	29.5	245	2109092385
37.6767	0	1	22.5827	2	2	2690	36.4286	0	1	49	0	0	0	0	0	0	0	1	0	0	0	0	0	1	26	2.2	36.1	207	-446707200
30.3808	0	1	23.03	2	2	2750	36.7143	0	1	49	1	0	0	0	0	0	0	0	1	1	0	0	0	1	26.1429	3.3	43.6	148	1532750793
33.8274	0	1	21.2585	2	2	2250	36.7143	0	1	46	1	1	1	0	0	0	0	0	0	0	0	0	0	1	22.4286	2.8	42.9	155	-931101003
25.8192	0	1	20.5761	2	1	2580	35.5714	0	1	49	1	1	0	1	0	0	0	0	0	0	0	0	0	1	25.4286	3.4	35.6	150	959724094
30.8877	0	1	21.875	2	2	2280	36.2857	0	1	45	0	1	1	0	0	0	0	0	0	0	0	0	0	1	26.1429	3.2	33.3	231	-1475304697
33.8438	0	1	25.8876	2	2	3300	39.8571	0	0	50	0	0	0	0	0	0	0	0	0	0	0	0	0	1	25.8571	2.7	45.2	206	-693580662
28.9041	0	1	25.5296	2	1	2380	37.8571	0	0	48	0	1	1	0	0	0	0	0	0	0	0	0	0	1	25.5714	2.5	40.1	154	728301358
27.6274	0	0	19.5312	2	1	3350	38.8571	0	0	50	0	0	0	0	0	0	0	0	0	0	0	0	0	1	25.2857	2.8	42.6	206	1506943257
38.3836	0	1	26.6667	2	1	2380	36.4286	0	1	48	1	0	0	0	0	0	0	0	0	0	0	0	0	1	25.5714	4.1	37	132	277662208
27.7342	0	0	23.8751	2	2	2350	37.8571	0	0	49	1	1	1	0	1	1	0	0	0	0	0	0	0	1	25.2857	3.2	48.8	201	406925585
33.5973	0	1	30.1162	2	1	3760	37.4286	0	0	50	0	0	0	0	0	0	0	1	0	0	0	0	0	1	25	3	40.4	248	-1702866227
32.9726	0	1	26.7698	3	2	3530	39.7143	0	0	51	1	0	0	0	0	0	0	0	0	0	0	0	0	1	25.5714	2.2	47.1	252	-23277215
30.663	0	1	28.125	2	1	2250	34	0	1	48	1	1	0	1	0	0	1	0	0	0	0	0	0	1	27	1.6	41.2	259	1211776114
25.5014	0	1	41.0156	2	1	2300	37.5714	0	0	48	1	1	1	1	0	0	0	0	0	0	0	0	0	1	25.4286	1.5	43.3	271	168017041
33.5863	0	0	19.1327	2	2	2110	37.7143	0	0	48	1	1	1	0	0	1	0	0	0	0	0	0	0	1	27.2857	2.3	62.4	254	1926802117
27.5178	0	0	18.7888	1	2	2700	38	0	0	49	0	0	0	0	0	0	0	0	0	0	0	0	0	1	25.5714	2.7	42	204	-118713824
33.0329	0	1	31.25	2	2	1940	34	0	1	40	1	1	0	1	0	0	0	1	0	0	0	0	0	1	26.2857	2.1	33	168	-1808148017
24.0082	0	1	22.4913	2	1	2710	37.2857	0	0	49	0	0	0	0	0	0	0	0	0	0	0	0	0	1	26.1429	3.3	36.6	277	-1883302348
26.2329	0	0	26.0375	2	1	2400	36.1429	0	1	48	1	0	0	0	0	0	0	0	0	0	0	0	0	1	26	2.1	33.2	206	-2056135902
30.6959	0	0	22.0317	1	2	2900	37.7143	0	0	49	0	0	0	0	0	0	0	1	0	0	0	0	0	1	25.5714	2.2	39.8	215	-706776837
32.9205	0	0	25	2	2	1920	34.4286	0	1	46	1	1	1	1	0	0	0	1	1	0	0	1	0	1	25.1429	2.3	32.4	273	1007465368
32.1616	0	1	28.125	2	1	3390	38.1429	0	0	50	0	0	0	0	0	0	0	1	0	0	0	0	0	1	25.7143	1.9	41.6	157	1162240606
36.3808	0	0	23.4375	2	1	1460	33.1429	1	1	44	1	1	1	1	1	1	0	1	0	0	0	0	0	1	26.5714	2.2	47.1	229	-1898462082
27.6247	0	0	22.0317	2	2	1780	34.2857	0	1	41	1	1	1	1	0	1	0	0	1	0	1	1	0	1	24.8571	2.4	43.9	146	1029863539
27.9973	0	1	20.9042	2	2	2840	39.7143	0	0	50	0	0	0	0	0	0	0	0	0	0	0	0	0	1	25.4286	3.3	50.1	251	-1964976312
33.9616	0	0	31.6158	2	2	2050	34.8571	0	1	47	1	1	1	1	0	0	0	0	1	1	0	0	0	1	26.1429	3.2	47.9	241	631905883
29.1123	0	0	19.7711	2	2	2220	36.4286	0	1	45	1	1	1	1	0	1	0	0	1	1	0	0	0	1	26.2857	1.8	46	158	876376567
34.8411	0	0	22.4059	2	2	2470	36.8571	0	1	47	1	1	0	1	0	0	0	1	0	0	0	0	0	1	27	3.6	46.9	219	193516704
33.3753	0	1	27.0552	2	1	2540	36.4286	0	1	49	1	1	0	1	0	0	0	1	0	0	0	0	0	1	26.2857	2.4	31	198	995062131
33.4493	0	1	19.5556	2	2	2800	36.7143	0	1	48	0	0	0	0	0	0	0	0	0	0	0	0	0	1	25.4286	2.2	23	197	-1534840141
33.7671	0	1	24.8358	2	2	2120	35.5714	0	1	44	1	1	1	0	0	0	0	1	0	0	0	0	0	1	26.7143	2.9	44.4	193	1306120083
26.0685	0	0	20.3223	2	1	2530	35.8571	0	1	47	1	1	0	1	0	0	0	0	0	0	0	0	0	1	25.8571	2.6	35.8	274	-1636126949
28.9836	0	0	28.2284	2	1	2640	36.4286	0	1	48	1	1	0	1	0	0	0	1	0	0	0	0	0	1	27.2857	3.3	44.8	296	1418081168
24.5562	0	0	30.1103	2	1	2270	35.4286	0	1	48	1	1	0	1	0	0	0	0	0	0	0	0	0	1	27.2857	3.4	50.8	228	-1942834497
29.6767	0	0	26.7094	2	1	3930	39.7143	0	0	51	0	0	0	0	0	0	0	0	0	0	0	0	0	1	27.8571	4.2	39.5	#NULL!	-131917651
28.7534	0	0	30.4688	2	2	1140	30.7143	1	1	36	1	1	1	1	0	1	0	0	1	0	1	0	0	1	27.2857	3.3	55.7	250	2135079288
34.1479	0	0	28.6501	2	2	2050	34	0	1	45	1	1	0	1	0	0	0	1	0	0	0	0	0	1	26.2857	1.6	39.3	156	-408635875
37.1589	0	0	22.4913	1	2	2400	37.7143	0	0	49	1	1	1	0	0	0	0	1	0	0	0	0	0	1	27.2857	2.2	44.2	204	-1273245579
28.7041	0	0	27.3438	2	2	3280	34.4286	0	1	50	0	0	0	0	0	0	0	0	0	0	0	0	0	1	25.8571	3.2	50.8	253	1384028324
33.2959	0	0	19.052	2	2	1700	31.8571	1	1	45	1	1	0	1	0	1	0	1	0	0	0	0	0	1	27.7143	3.1	45	184	-705127677
26.4493	0	0	19.9219	2	1	2280	36	0	1	43	1	1	0	1	1	0	0	0	0	0	0	0	0	1	27	1.8	30.5	205	1090414865
28.5562	0	0	28.5156	2	1	2140	37.2857	0	0	47	1	1	1	0	0	0	0	0	0	0	0	0	0	1	24.8571	2	39	107	1816357289
27.2712	0	0	23.4375	2	2	3100	39.7143	0	0	50	1	0	0	0	0	0	0	0	0	0	0	0	0	1	27.7143	2.8	42.5	262	783367651
37.0521	0	0	30.6667	2	2	1770	35.4286	0	1	42	1	1	1	0	0	1	0	1	0	0	0	0	0	1	23	2.6	45.3	160	-2040742077
27.537	0	0	18.8707	1	1	3250	38.4286	0	0	50	1	1	0	0	1	0	0	0	0	0	0	0	0	1	26.4286	2.6	51.6	168	1343022136
29.611	0	1	21.573	2	1	1700	34.4286	0	1	43	1	1	1	1	0	0	0	0	0	0	0	0	0	1	25.5714	2.1	43.4	240	115864083
28.5479	0	0	20.3244	2	1	1600	32.4286	1	1	45	1	1	1	1	0	1	0	0	1	0	1	1	0	1	25.2857	2.5	55.5	212	523893596
32.8027	0	1	20.9572	2	2	2420	37	0	0	45	0	0	0	0	0	0	0	1	0	0	0	0	0	1	24.1429	4.1	56	177	-338955764
31.9479	0	0	33.4622	2	1	3030	37	0	0	49	0	0	0	0	0	0	0	0	0	0	0	0	0	1	26.1429	3.5	49.9	228	1139353730
26.9096	0	1	20.3125	2	1	1310	30	1	1	37	1	1	0	1	0	1	0	0	0	0	0	0	0	1	25.5714	2.8	46.7	339	1230981494
29.7233	0	0	21.8314	2	1	2580	38.2857	0	0	49	0	1	1	0	0	0	0	0	0	0	0	0	0	1	26.2857	3.2	37.1	243	833216321
32.6658	1	0	19.9792	2	2	2350	37	0	0	45	0	1	1	0	0	0	0	1	0	0	0	0	0	1	26.1429	2.3	48.1	302	63912381
26.0521	0	0	35.9268	2	1	3650	36.5714	0	1	50	1	1	0	1	0	0	0	0	0	0	0	0	0	1	26.7143	2.1	53.3	241	-2099981685
28.7534	0	0	22.4103	1	2	2750	37.4286	0	0	49	1	0	0	0	0	0	0	1	0	0	0	0	0	1	25.8571	2.2	36.8	180	69080322
31.537	0	1	27.5482	2	1	3170	35.1429	0	1	49	1	1	0	1	0	1	0	1	0	0	0	0	0	1	26.5714	1.9	40.3	300	1691652385
29.5288	1	0	25.3906	2	2	1100	29.7143	1	1	28	1	1	1	1	1	0	1	1	0	0	0	0	0	1	25.1429	4.8	50.6	366	1493428983
32.1616	0	0	22.6003	2	2	2150	34.8571	0	1	45	1	1	0	1	0	1	0	0	0	0	0	0	0	1	25	2.4	46.8	146	1205689867
27.8548	0	0	26.6728	2	1	2700	39.2857	0	0	49	0	1	1	0	0	0	0	0	0	0	0	0	0	1	25.1429	2.3	50.2	216	-1867106834
33.8384	1	0	24.8047	2	2	2560	34	0	1	48	1	1	0	1	0	0	0	1	0	0	0	0	0	1	27.7143	3.7	33.1	237	1351456757
35.5288	0	0	19.6846	2	1	1900	34.7143	0	1	43	1	1	1	1	0	0	0	1	1	0	1	0	0	1	27.8571	3.7	63.1	282	667338674
28.7205	0	1	19.7599	2	2	3590	40.2857	0	0	51	0	0	0	0	0	0	0	0	0	0	0	0	0	1	26.2857	3.7	40.9	172	-56761802
26.5068	0	0	20.4491	2	1	2550	36.5714	0	1	48	0	0	0	0	0	0	0	0	1	0	1	0	0	1	27.5714	3.2	56.4	213	-354835856
34.8411	1	0	20.8117	2	2	2190	36.2857	0	1	44	1	1	1	0	1	0	0	1	0	0	0	0	0	1	26	2.3	49.9	181	192434179
29.3041	0	1	22.8624	2	1	1635	33	1	1	39	1	1	1	1	0	1	0	0	0	0	0	0	0	1	26.1429	3	50.3	280	-374128082
33.8082	0	0	33.341	2	2	1750	35.7143	0	1	39	1	1	1	0	1	0	0	0	0	0	0	0	0	1	25.7143	1.8	50.7	308	2144545114
32.9178	0	0	25.688	2	1	2040	33.4286	1	1	45	1	1	0	1	0	0	0	0	0	0	0	0	0	1	26.1429	2.4	53.9	344	2063524242
31.0685	0	1	21.9671	2	1	2320	37.1429	0	0	47	1	1	1	0	0	0	0	0	0	0	0	0	0	1	26.5714	2.4	46.2	284	1174600160
26.5589	0	1	30.4688	2	1	1260	32.2857	1	1	38	1	1	1	1	0	1	0	1	1	0	0	1	0	1	26.2857	3.2	40.4	315	1155321307
33.789	0	1	39.7924	2	2	1630	33.4286	1	1	42	1	1	1	1	0	0	0	1	1	0	1	0	0	1	27.8571	5	56.2	193	1105176763
30.9808	0	0	21.1553	2	2	3350	40.4286	0	0	50	0	0	0	0	0	0	0	0	0	0	0	0	0	1	25.7143	2.4	48.6	352	-1103667995
26.8301	0	1	23.2335	2	2	2700	37	0	0	49	1	1	0	1	0	0	0	0	0	0	0	0	0	1	27.1429	1.9	40.6	281	-301395191
30.3068	0	0	16.937	1	2	2350	38.2857	0	0	48	1	1	1	0	0	1	0	0	0	0	0	0	0	1	26.8571	2.6	43.7	239	273651998
27.0055	0	1	31.8878	2	1	2860	36.2857	0	1	50	0	0	0	0	0	0	0	0	0	0	0	0	0	1	26.2857	2.4	52.7	261	-484474241
30.1671	0	1	26.7698	2	2	3480	36.2857	0	1	49	1	1	0	0	1	0	0	0	0	0	0	0	0	1	25.4286	2.1	44.9	160	-403990539
30.7945	0	0	19.2336	2	1	2300	35.8571	0	1	48	1	0	0	0	0	0	0	0	0	0	0	0	0	1	26.2857	2.4	46.5	189	-1366696629
27.9123	1	1	30.0712	2	1	1350	32.4286	1	1	42	1	1	1	1	1	1	0	1	0	0	0	0	0	1	25.5714	3.1	52.4	323	186706034
29.5425	0	1	23.8281	2	2	970	28.8571	1	1	34	1	1	1	1	0	1	0	0	1	0	1	1	0	1	25.1429	4	35.4	252	-1595115669
38.411	1	0	27.2173	2	1	1980	34.4286	0	1	41	1	0	0	0	0	0	0	1	0	0	0	0	0	1	27.4286	1.9	37.7	240	-610066432
26.1425	0	0	22.2063	2	1	3690	41	0	0	50	0	0	0	0	0	0	0	0	1	1	0	0	0	1	26.8571	2.2	54.8	251	-2088459148
34.4301	0	0	24.6094	2	2	2400	36.7143	0	1	48	1	1	0	0	1	0	0	0	0	0	0	0	0	1	25.8571	2.7	39.4	237	-1818399148
30.1068	0	0	24.4646	2	2	3080	38.5714	0	0	50	0	0	0	0	0	0	0	0	0	0	0	0	0	1	25.4286	3.6	50.2	205	569261956
34.7644	0	1	20.1348	2	2	1800	34.2857	0	1	42	1	1	1	1	0	1	0	1	0	0	0	0	0	1	26.8571	2.7	46.8	209	1858008058
33.2575	0	0	28.0404	1	2	2000	36.1429	0	1	45	1	1	1	1	0	1	0	0	0	0	0	0	0	1	24.7143	2.2	27.8	265	-1841324102
34.1534	0	0	25.7812	1	2	2550	36.5714	0	1	48	1	1	0	0	1	0	0	1	0	0	0	0	0	1	25.5714	1.6	43.4	113	1618653332
29.874	0	1	17.5781	2	1	2400	38.2857	0	0	48	0	1	1	0	0	0	0	0	0	0	0	0	0	1	26.8571	4.5	50.3	166	-838655386
29.8932	0	1	17.9688	2	1	2470	38.7143	0	0	49	0	1	1	0	0	0	0	0	0	0	0	0	0	1	25.4286	3.2	44.6	188	-1309943333
31.2356	0	1	23.4375	2	2	1930	34.8571	0	1	43	1	1	1	0	1	0	0	0	0	0	0	0	0	1	25	2.6	39.9	194	-1309383385
28.3918	0	1	21.1111	2	2	3480	39.2857	0	0	50	0	0	0	0	0	0	0	0	0	0	0	0	0	1	26.1429	1.9	32.8	244	1864861722
33.6712	0	0	20.83	2	2	2200	36.5714	0	1	47	1	1	1	0	0	0	0	1	0	0	0	0	0	1	26.4286	1.8	50.1	211	-1121003587
33.7699	1	0	37.1094	2	1	4540	35.8571	0	1	51	1	1	0	1	0	0	1	1	1	0	0	1	0	1	27.4286	2.6	44.4	244	2126066040
28.8082	0	0	27.0993	2	1	850	30.1429	1	1	34	1	1	1	1	0	0	0	0	0	0	0	0	0	1	24.8571	2.6	53.4	358	656846128
34.9288	0	0	25.2174	2	1	2380	35.4286	0	1	49	1	0	0	0	0	0	0	1	0	0	0	0	0	1	25.2857	2.8	34.6	169	201065993
27.9726	0	1	17.6606	2	1	2700	37.5714	0	0	50	0	0	0	0	0	0	0	0	0	0	0	0	0	1	25.5714	3	60.6	210	1695746053
32.7205	0	1	23.634	2	1	1940	31.5714	1	1	48	1	1	0	1	0	0	0	1	0	0	0	0	0	1	24.5714	2.5	38.4	196	375825464
35.5315	0	1	23.0332	2	2	1620	33.5714	1	1	43	1	1	1	1	0	1	1	1	1	0	1	1	1	1	26	2.6	45.9	277	-2123257161
33.8767	0	1	25.3444	1	1	3130	37.5714	0	0	50	0	0	0	0	0	0	0	1	1	1	0	1	0	1	27.1429	2.6	45.8	265	1379732679
30.5288	0	1	20.0288	2	2	2780	38	0	0	49	0	0	0	0	0	0	0	0	0	0	0	0	0	1	26.7143	2.5	45.2	176	2019283585
26.5233	0	1	18.8189	2	1	2570	37.4286	0	0	48	0	0	0	0	0	0	0	0	0	0	0	0	0	1	25.8571	2.3	40.2	209	2071163123
27.0603	0	1	18.591	2	2	1300	35.1429	0	1	40	1	1	1	1	1	0	0	0	0	0	0	0	0	1	26	2.6	37.6	178	518492324
33.137	0	1	32.3884	2	1	2950	37.8571	0	0	51	0	0	0	0	0	0	0	1	0	0	0	0	0	1	26.2857	1.8	40.1	252	-1600519771
25.0466	0	0	20.7031	2	2	1690	33.2857	1	1	43	1	1	1	1	1	1	0	0	1	0	1	0	0	1	25.1429	2.5	39.1	159	287475469
31.6082	0	1	29.3848	2	2	2000	37	0	0	45	0	1	1	0	0	0	0	0	0	0	0	0	0	1	26.4286	2.3	51	238	-532215214
25.4301	0	0	23.4375	2	1	1790	34.2857	0	1	43	1	1	1	1	0	1	0	0	1	0	0	1	0	1	26.7143	3	37.6	246	840755493
30.2767	0	1	20.4491	2	2	2000	35.4286	0	1	46	1	1	1	0	0	0	0	0	0	0	0	0	0	1	26.1429	2.7	47.3	196	962351445
29.2767	0	0	21.9671	2	2	3170	39.7143	0	0	50	0	0	0	0	0	0	0	0	0	0	0	0	0	1	23.8571	1.6	44.9	144	-509139964
27.6466	0	0	20.0288	2	2	2540	37.1429	0	0	48	0	0	0	0	0	0	0	0	0	0	0	0	0	1	24.5714	2.8	49.8	151	1723005669
32.3096	0	1	26.3465	2	1	1150	30.4286	1	1	36	1	1	1	1	0	0	1	0	0	0	0	0	0	1	25.8571	2.9	49.1	361	-213030306
38.137	0	1	26.3146	2	2	3300	37.5714	0	0	50	0	0	0	0	0	0	0	1	0	0	0	0	0	1	26	2.4	54.8	157	1660822648
35.1425	0	1	19.4674	2	2	1390	32.7143	1	1	43	1	1	1	1	0	0	0	0	0	0	0	0	0	1	26.4286	2.5	45.5	180	429972077
30.8904	0	1	18.8271	2	2	2770	39.4286	0	0	50	0	0	0	0	0	0	0	0	0	0	0	0	0	1	24.8571	2.9	45.5	252	781058909
26.6411	0	0	20.3125	1	2	2510	37.1429	0	0	48	0	0	0	0	0	0	0	0	0	0	0	0	0	1	26.4286	2.5	59.5	198	-62584132
24.1671	0	0	26.0407	1	2	3250	39.7143	0	0	50	1	0	0	0	0	0	0	0	0	0	0	0	0	1	27.1429	2.2	45.9	247	-837610438
31.8274	0	0	25.4028	1	1	3530	37.4286	0	0	51	1	0	0	0	0	0	0	1	0	0	0	0	0	1	26.7143	2	48.1	275	2104535339
32.0493	0	0	20.5592	2	1	3090	38.5714	0	0	50	0	0	0	0	0	0	0	0	0	0	0	0	0	1	25.2857	3.5	42.8	295	1318215523
34.3973	0	1	23.7253	2	2	1810	33.8571	1	1	46	1	1	1	1	0	0	0	1	1	0	0	1	0	1	26.2857	1.9	40.6	220	-321560938

## Sheet: After matching adverse neonatal
age	History of hypertension (0 no; 1 yes)	Family history of hypertension (0 no; 1 yes)	Preconception BMI	Method of delivery (1 natural delivery; 2 Cesarean section; 3 Midwifery)	Newborn sex (1 boy, 2 girls)	Newborn weight (g)	Gestational weeks	Preterm birth earlier than 34 weeks (0 no 1 Yes)	Preterm birth earlier than 37 weeks (0 no 1 yes)	Newborn length (cm)	Whether the newborn is admitted to the neonatal department (0 no, 1 yes)	Adverse neonatal delivery outcomes (0 No 1 Yes)	Small for gestational age (0 no; 1 yes)	Respiratory distress syndrome (0 no; 1 yes)	Intracranial hemorrhage (0 no; 1 yes)	Neonatal infection (0 no; 1 yes)	Neonatal asphyxia (0 no; 1 yess)	Adverse maternal delivery outcomes (0 No 1 Yes)	Retinal detachment (0 No 1 Yes)	Placental abruption (0 no 1 yes)	HELLP syndrome (0 No 1 Yes)	Postpartum hemorrhage (0 No 1 Yes)	Group (0 control; 1 Preeclampsia)	Group (0 control; 1 Preeclampsia)	Second trimester check gestational week	Second trimester urea nitrogen (mmolL)	Second trimester creatinine (μmolL)	Second trimester uric acid (μmolL)	Match_G
32.7205	0	1	23.634	2	1	1940	31.5714	1	1	48	1	1	0	1	0	0	0	0	0	0	0	0	1	1	24.5714	2.5	38.4	196	375825464
29.8932	0	1	17.9688	2	1	2470	38.7143	0	0	49	0	1	1	0	0	0	0	0	0	0	0	0	2	1	25.4286	3.2	44.6	188	-1309943333
24.5562	0	0	30.1103	2	1	2270	35.4286	0	1	48	1	1	0	1	0	0	0	0	0	0	0	0	1	1	27.2857	3.4	50.8	228	-1942834497
33.3781	1	1	24.8358	2	2	1430	32.8571	1	1	39	1	1	1	1	0	1	0	0	0	0	0	0	1	1	26.8571	3.3	40.7	91	-1698264513
37.1589	0	0	22.4913	1	2	2400	37.7143	0	0	49	1	1	1	0	0	0	0	0	0	0	0	0	2	1	27.2857	2.2	44.2	204	-1273245579
34.4301	0	0	24.6094	2	2	2400	36.7143	0	1	48	1	1	0	0	1	0	0	0	0	0	0	0	1	1	25.8571	2.7	39.4	237	-1818399148
31.537	0	1	27.5482	2	1	3170	35.1429	0	1	49	1	1	0	1	0	1	0	0	0	0	0	0	2	1	26.5714	1.9	40.3	300	1691652385
26.9096	0	1	20.3125	2	1	1310	30	1	1	37	1	1	0	1	0	1	0	0	0	0	0	0	1	1	25.5714	2.8	46.7	339	1230981494
33.8082	0	0	33.341	2	2	1750	35.7143	0	1	39	1	1	1	0	1	0	0	0	0	0	0	0	1	1	25.7143	1.8	50.7	308	2144545114
29.874	0	1	17.5781	2	1	2400	38.2857	0	0	48	0	1	1	0	0	0	0	0	0	0	0	0	1	1	26.8571	4.5	50.3	166	-838655386
28.8082	0	0	27.0993	2	1	850	30.1429	1	1	34	1	1	1	1	0	0	0	0	0	0	0	0	1	1	24.8571	2.6	53.4	358	656846128
30.2767	0	1	20.4491	2	2	2000	35.4286	0	1	46	1	1	1	0	0	0	0	0	0	0	0	0	1	1	26.1429	2.7	47.3	196	962351445
33.9315	0	0	21.1073	2	1	2150	36.5714	0	1	45	1	1	1	1	0	0	0	0	0	0	0	0	2	1	25.1429	2.2	47.5	192	768093760
27.9123	1	1	30.0712	2	1	1350	32.4286	1	1	42	1	1	1	1	1	1	0	0	0	0	0	0	2	1	25.5714	3.1	52.4	323	186706034
27.537	0	0	18.8707	1	1	3250	38.4286	0	0	50	1	1	0	0	1	0	0	0	0	0	0	0	1	1	26.4286	2.6	51.6	168	1343022136
30.8877	0	1	21.875	2	2	2280	36.2857	0	1	45	0	1	1	0	0	0	0	0	0	0	0	0	2	1	26.1429	3.2	33.3	231	-1475304697
32.3096	0	1	26.3465	2	1	1150	30.4286	1	1	36	1	1	1	1	0	0	1	0	0	0	0	0	2	1	25.8571	2.9	49.1	361	-213030306
28.9041	0	1	25.5296	2	1	2380	37.8571	0	0	48	0	1	1	0	0	0	0	0	0	0	0	0	1	1	25.5714	2.5	40.1	154	728301358
29.3041	0	1	22.8624	2	1	1635	33	1	1	39	1	1	1	1	0	1	0	0	0	0	0	0	1	1	26.1429	3	50.3	280	-374128082
30.1671	0	1	26.7698	2	2	3480	36.2857	0	1	49	1	1	0	0	1	0	0	0	0	0	0	0	1	1	25.4286	2.1	44.9	160	-403990539
34.8411	1	0	20.8117	2	2	2190	36.2857	0	1	44	1	1	1	0	1	0	0	0	0	0	0	0	1	1	26	2.3	49.9	181	192434179
33.2575	0	0	28.0404	1	2	2000	36.1429	0	1	45	1	1	1	1	0	1	0	0	0	0	0	0	1	1	24.7143	2.2	27.8	265	-1841324102
26.0521	0	0	35.9268	2	1	3650	36.5714	0	1	50	1	1	0	1	0	0	0	0	0	0	0	0	1	1	26.7143	2.1	53.3	241	-2099981685
29.7233	0	0	21.8314	2	1	2580	38.2857	0	0	49	0	1	1	0	0	0	0	0	0	0	0	0	1	1	26.2857	3.2	37.1	243	833216321
27.0603	0	1	18.591	2	2	1300	35.1429	0	1	40	1	1	1	1	1	0	0	0	0	0	0	0	2	1	26	2.6	37.6	178	518492324
31.2356	0	1	23.4375	2	2	1930	34.8571	0	1	43	1	1	1	0	1	0	0	0	0	0	0	0	1	1	25	2.6	39.9	194	-1309383385
29.611	0	1	21.573	2	1	1700	34.4286	0	1	43	1	1	1	1	0	0	0	0	0	0	0	0	1	1	25.5714	2.1	43.4	240	115864083
27.7342	0	0	23.8751	2	2	2350	37.8571	0	0	49	1	1	1	0	1	1	0	0	0	0	0	0	1	1	25.2857	3.2	48.8	201	406925585
25.8192	0	1	20.5761	2	1	2580	35.5714	0	1	49	1	1	0	1	0	0	0	0	0	0	0	0	1	1	25.4286	3.4	35.6	150	959724094
30.211	0	0	25.6369	2	1	2820	36.4286	0	1	48	1	1	0	1	0	0	0	0	0	0	0	0	1	1	27.1429	2.8	46	281	-280558237
26.4493	0	0	19.9219	2	1	2280	36	0	1	43	1	1	0	1	1	0	0	0	0	0	0	0	1	1	27	1.8	30.5	205	1090414865
26.8301	0	1	23.2335	2	2	2700	37	0	0	49	1	1	0	1	0	0	0	0	0	0	0	0	2	1	27.1429	1.9	40.6	281	-301395191
32.1616	0	0	22.6003	2	2	2150	34.8571	0	1	45	1	1	0	1	0	1	0	0	0	0	0	0	1	1	25	2.4	46.8	146	1205689867
31.6082	0	1	29.3848	2	2	2000	37	0	0	45	0	1	1	0	0	0	0	0	0	0	0	0	1	1	26.4286	2.3	51	238	-532215214
27.6247	0	0	22.0317	2	2	1780	34.2857	0	1	41	1	1	1	1	0	1	0	1	0	1	1	0	1	1	24.8571	2.4	43.9	146	1029863539
25.4301	0	0	23.4375	2	1	1790	34.2857	0	1	43	1	1	1	1	0	1	0	1	0	0	1	0	1	1	26.7143	3	37.6	246	840755493
32.9205	0	0	25	2	2	1920	34.4286	0	1	46	1	1	1	1	0	0	0	1	0	0	1	0	1	1	25.1429	2.3	32.4	273	1007465368
26.5589	0	1	30.4688	2	1	1260	32.2857	1	1	38	1	1	1	1	0	1	0	1	0	0	1	0	1	1	26.2857	3.2	40.4	315	1155321307
28.5479	0	0	20.3244	2	1	1600	32.4286	1	1	45	1	1	1	1	0	1	0	1	0	1	1	0	1	1	25.2857	2.5	55.5	212	523893596
28.0356	0	0	28.7109	2	1	2100	34.7143	0	1	46	1	1	0	1	0	0	0	1	0	0	1	0	2	1	25.4286	3.2	47.3	188	804596658
29.9068	1	1	25.9695	2	2	1200	29.8571	1	1	42	1	1	1	1	0	0	0	1	1	0	0	0	1	1	27.4286	1.8	38.4	268	1844990703
33.9616	0	0	31.6158	2	2	2050	34.8571	0	1	47	1	1	1	1	0	0	0	1	1	0	0	0	1	1	26.1429	3.2	47.9	241	631905883
28.4822	0	1	20.3223	2	1	2000	33.8571	1	1	45	1	1	0	1	1	0	0	1	0	1	0	0	2	1	25.1429	3.4	43.1	209	-977858487
28.7534	0	0	30.4688	2	2	1140	30.7143	1	1	36	1	1	1	1	0	1	0	1	0	1	0	0	1	1	27.2857	3.3	55.7	250	2135079288
29.1123	0	0	19.7711	2	2	2220	36.4286	0	1	45	1	1	1	1	0	1	0	1	1	0	0	0	2	1	26.2857	1.8	46	158	876376567
26.1397	0	1	27.9155	2	2	3150	37.2857	0	0	50	0	0	0	0	0	0	0	0	0	0	0	0	2	1	27	2.7	45.6	313	-301395191
33.5973	0	1	30.1162	2	1	3760	37.4286	0	0	50	0	0	0	0	0	0	0	0	0	0	0	0	2	1	25	3	40.4	248	-1841324102
26.2329	0	0	26.0375	2	1	2400	36.1429	0	1	48	1	0	0	0	0	0	0	0	0	0	0	0	1	1	26	2.1	33.2	206	518492324
33.8438	0	1	25.8876	2	2	3300	39.8571	0	0	50	0	0	0	0	0	0	0	0	0	0	0	0	2	1	25.8571	2.7	45.2	206	192434179
27.0055	0	1	31.8878	2	1	2860	36.2857	0	1	50	0	0	0	0	0	0	0	0	0	0	0	0	2	1	26.2857	2.4	52.7	261	-2099981685
33.137	0	1	32.3884	2	1	2950	37.8571	0	0	51	0	0	0	0	0	0	0	0	0	0	0	0	1	1	26.2857	1.8	40.1	252	631905883
30.8904	0	1	18.8271	2	2	2770	39.4286	0	0	50	0	0	0	0	0	0	0	0	0	0	0	0	1	1	24.8571	2.9	45.5	252	-1309383385
28.1973	0	1	26.1719	2	1	3590	37.2857	0	0	50	1	0	0	0	0	0	0	0	0	0	0	0	1	1	25	2	46.9	315	656846128
28.3918	0	1	21.1111	2	2	3480	39.2857	0	0	50	0	0	0	0	0	0	0	0	0	0	0	0	2	1	26.1429	1.9	32.8	244	-374128082
33.1808	0	0	22.0317	2	1	2500	37.1429	0	0	50	0	0	0	0	0	0	0	0	0	0	0	0	2	1	24.8571	2.2	38.4	226	1007465368
27.9973	0	1	20.9042	2	2	2840	39.7143	0	0	50	0	0	0	0	0	0	0	0	0	0	0	0	1	1	25.4286	3.3	50.1	251	-977858487
33.8767	0	1	25.3444	1	1	3130	37.5714	0	0	50	0	0	0	0	0	0	0	1	1	0	1	0	2	1	27.1429	2.6	45.8	265	-1698264513
31.1342	0	0	21.3593	2	2	2730	39	0	0	46	0	0	0	0	0	0	0	0	0	0	0	0	1	1	27.5714	3.7	52.2	204	-280558237
25.8466	0	0	22.8329	1	1	3140	40.2857	0	0	50	0	0	0	0	0	0	0	0	0	0	0	0	2	1	26.4286	1.2	29	159	840755493
30.5288	0	1	20.0288	2	2	2780	38	0	0	49	0	0	0	0	0	0	0	0	0	0	0	0	2	1	26.7143	2.5	45.2	176	-838655386
29.811	0	1	22.4913	2	2	2900	37.7143	0	0	49	0	0	0	0	0	0	0	0	0	0	0	0	1	1	25.7143	3.8	50.8	236	962351445
31.9479	0	0	33.4622	2	1	3030	37	0	0	49	0	0	0	0	0	0	0	0	0	0	0	0	2	1	26.1429	3.5	49.9	228	-532215214
32.8027	0	1	20.9572	2	2	2420	37	0	0	45	0	0	0	0	0	0	0	0	0	0	0	0	2	1	24.1429	4.1	56	177	375825464
27.6274	0	0	19.5312	2	1	3350	38.8571	0	0	50	0	0	0	0	0	0	0	0	0	0	0	0	2	1	25.2857	2.8	42.6	206	406925585
33.4493	0	1	19.5556	2	2	2800	36.7143	0	1	48	0	0	0	0	0	0	0	0	0	0	0	0	2	1	25.4286	2.2	23	197	-1818399148
32.1616	0	1	28.125	2	1	3390	38.1429	0	0	50	0	0	0	0	0	0	0	0	0	0	0	0	2	1	25.7143	1.9	41.6	157	-213030306
28.7205	0	1	19.7599	2	2	3590	40.2857	0	0	51	0	0	0	0	0	0	0	0	0	0	0	0	2	1	26.2857	3.7	40.9	172	876376567
30.6959	0	0	22.0317	1	2	2900	37.7143	0	0	49	0	0	0	0	0	0	0	0	0	0	0	0	2	1	25.5714	2.2	39.8	215	-1309943333
37.5041	1	1	22.2656	1	2	2850	39.7143	0	0	49	0	0	0	0	0	0	0	0	0	0	0	0	2	1	26.8571	3.2	52.2	201	-1273245579
30.1068	0	0	24.4646	2	2	3080	38.5714	0	0	50	0	0	0	0	0	0	0	0	0	0	0	0	2	1	25.4286	3.6	50.2	205	115864083
32.9726	0	1	26.7698	3	2	3530	39.7143	0	0	51	1	0	0	0	0	0	0	0	0	0	0	0	2	1	25.5714	2.2	47.1	252	2144545114
29.137	1	0	20.9366	2	1	3250	28.2857	1	1	50	0	0	0	0	0	0	0	1	0	0	1	0	1	1	27.5714	4.4	69.7	286	2135079288
32.0493	0	0	20.5592	2	1	3090	38.5714	0	0	50	0	0	0	0	0	0	0	0	0	0	0	0	2	1	25.2857	3.5	42.8	295	1205689867
26.6411	0	0	20.3125	1	2	2510	37.1429	0	0	48	0	0	0	0	0	0	0	0	0	0	0	0	2	1	26.4286	2.5	59.5	198	1155321307
34.9288	0	0	25.2174	2	1	2380	35.4286	0	1	49	1	0	0	0	0	0	0	0	0	0	0	0	1	1	25.2857	2.8	34.6	169	768093760
28.7534	0	0	22.4103	1	2	2750	37.4286	0	0	49	1	0	0	0	0	0	0	0	0	0	0	0	2	1	25.8571	2.2	36.8	180	728301358
30.9808	0	0	21.1553	2	2	3350	40.4286	0	0	50	0	0	0	0	0	0	0	0	0	0	0	0	1	1	25.7143	2.4	48.6	352	-403990539
28.7041	0	0	27.3438	2	2	3280	34.4286	0	1	50	0	0	0	0	0	0	0	0	0	0	0	0	2	1	25.8571	3.2	50.8	253	804596658
26.5233	0	1	18.8189	2	1	2570	37.4286	0	0	48	0	0	0	0	0	0	0	0	0	0	0	0	2	1	25.8571	2.3	40.2	209	959724094
28.5699	0	1	23.4375	3	2	3100	40	0	0	50	0	0	0	0	0	0	0	1	0	0	0	1	2	1	25.7143	2.6	48.1	150	523893596
26.1425	0	0	22.2063	2	1	3690	41	0	0	50	0	0	0	0	0	0	0	1	1	0	0	0	1	1	26.8571	2.2	54.8	251	1090414865
27.5178	0	0	18.7888	1	2	2700	38	0	0	49	0	0	0	0	0	0	0	0	0	0	0	0	2	1	25.5714	2.7	42	204	1230981494
31.8274	0	0	25.4028	1	1	3530	37.4286	0	0	51	1	0	0	0	0	0	0	0	0	0	0	0	2	1	26.7143	2	48.1	275	1691652385
30.7945	0	0	19.2336	2	1	2300	35.8571	0	1	48	1	0	0	0	0	0	0	0	0	0	0	0	1	1	26.2857	2.4	46.5	189	-1475304697
27.9726	0	1	17.6606	2	1	2700	37.5714	0	0	50	0	0	0	0	0	0	0	0	0	0	0	0	1	1	25.5714	3	60.6	210	186706034
24.1671	0	0	26.0407	1	2	3250	39.7143	0	0	50	1	0	0	0	0	0	0	0	0	0	0	0	1	1	27.1429	2.2	45.9	247	-1942834497
27.063	0	1	21.3599	2	1	3830	39.8571	0	0	53	0	0	0	0	0	0	0	0	0	0	0	0	2	1	26.4286	2.3	29.5	245	1343022136
30.3808	0	1	23.03	2	2	2750	36.7143	0	1	49	1	0	0	0	0	0	0	1	1	0	0	0	1	1	26.1429	3.3	43.6	148	833216321
27.6466	0	0	20.0288	2	2	2540	37.1429	0	0	48	0	0	0	0	0	0	0	0	0	0	0	0	2	1	24.5714	2.8	49.8	151	1029863539
29.011	0	1	18.7305	1	2	2650	37.8571	0	0	49	0	0	0	0	0	0	0	0	0	0	0	0	1	1	27.8571	2.3	55.7	230	1844990703

## Sheet: After the maternal adverse outc
age	History of hypertension (0 no; 1 yes)	Family history of hypertension (0 no; 1 yes)	Preconception BMI	Method of delivery (1 natural delivery; 2 Cesarean section; 3 Midwifery)	Newborn sex (1 boy, 2 girls)	Newborn weight (g)	Gestational weeks	Preterm birth earlier than 34 weeks (0 no 1 Yes)	Preterm birth earlier than 37 weeks (0 no 1 yes)	Newborn length (cm)	Whether the newborn is admitted to the neonatal department (0 no, 1 yes)	Adverse neonatal delivery outcomes (0 No 1 Yes)	Small for gestational age (0 no; 1 yes)	Respiratory distress syndrome (0 no; 1 yes)	Intracranial hemorrhage (0 no; 1 yes)	Neonatal infection (0 no; 1 yes)	Neonatal asphyxia (0 no; 1 yess)	Adverse maternal delivery outcomes (0 No 1 Yes)	Retinal detachment (0 No 1 Yes)	Placental abruption (0 no 1 yes)	HELLP syndrome (0 No 1 Yes)	Postpartum hemorrhage (0 No 1 Yes)	Group (0 control; 1 Preeclampsia)	Second trimester check gestational week	Second trimester urea nitrogen (mmolL)	Second trimester creatinine (μmolL)	Second trimester uric acid (μmolL)	Match_G
35.5315	0	1	23.0332	2	2	1620	33.5714	1	1	43	1	1	1	1	0	1	1	1	0	1	1	1	1	26	2.6	45.9	277	-2123257161
35.1425	0	1	19.4674	2	2	1390	32.7143	1	1	43	1	1	1	1	0	0	0	0	0	0	0	0	1	26.4286	2.5	45.5	180	-2123257161
26.1425	0	0	22.2063	2	1	3690	41	0	0	50	0	0	0	0	0	0	0	1	1	0	0	0	1	26.8571	2.2	54.8	251	-2088459148
27.063	0	1	21.3599	2	1	3830	39.8571	0	0	53	0	0	0	0	0	0	0	0	0	0	0	0	1	26.4286	2.3	29.5	245	-2088459148
29.5425	0	1	23.8281	2	2	970	28.8571	1	1	34	1	1	1	1	0	1	0	1	0	1	1	0	1	25.1429	4	35.4	252	-1595115669
30.1068	0	0	24.4646	2	2	3080	38.5714	0	0	50	0	0	0	0	0	0	0	0	0	0	0	0	1	25.4286	3.6	50.2	205	-1595115669
28.4822	0	1	20.3223	2	1	2000	33.8571	1	1	45	1	1	0	1	1	0	0	1	0	1	0	0	1	25.1429	3.4	43.1	209	-977858487
27.9726	0	1	17.6606	2	1	2700	37.5714	0	0	50	0	0	0	0	0	0	0	0	0	0	0	0	1	25.5714	3	60.6	210	-977858487
28.5699	0	1	23.4375	3	2	3100	40	0	0	50	0	0	0	0	0	0	0	1	0	0	0	1	1	25.7143	2.6	48.1	150	-516721618
27.9973	0	1	20.9042	2	2	2840	39.7143	0	0	50	0	0	0	0	0	0	0	0	0	0	0	0	1	25.4286	3.3	50.1	251	-516721618
26.5068	0	0	20.4491	2	1	2550	36.5714	0	1	48	0	0	0	0	0	0	0	1	0	1	0	0	1	27.5714	3.2	56.4	213	-354835856
27.1151	0	1	32.872	2	2	3000	37.1429	0	0	50	0	0	0	0	0	0	0	0	0	0	0	0	1	27.8571	2.3	42.9	358	-354835856
34.3973	0	1	23.7253	2	2	1810	33.8571	1	1	46	1	1	1	1	0	0	0	1	0	0	1	0	1	26.2857	1.9	40.6	220	-321560938
33.8438	0	1	25.8876	2	2	3300	39.8571	0	0	50	0	0	0	0	0	0	0	0	0	0	0	0	1	25.8571	2.7	45.2	206	-321560938
30.5452	0	0	31.6456	2	1	2520	35.4286	0	1	47	1	1	0	0	1	0	0	1	0	1	0	0	1	26	4.4	47.8	227	78567373
30.6959	0	0	22.0317	1	2	2900	37.7143	0	0	49	0	0	0	0	0	0	0	0	0	0	0	0	1	25.5714	2.2	39.8	215	78567373
25.0466	0	0	20.7031	2	2	1690	33.2857	1	1	43	1	1	1	1	1	1	0	1	0	1	0	0	1	25.1429	2.5	39.1	159	287475469
25.5014	0	1	41.0156	2	1	2300	37.5714	0	0	48	1	1	1	1	0	0	0	0	0	0	0	0	1	25.4286	1.5	43.3	271	287475469
28.5479	0	0	20.3244	2	1	1600	32.4286	1	1	45	1	1	1	1	0	1	0	1	0	1	1	0	1	25.2857	2.5	55.5	212	523893596
28.1973	0	1	26.1719	2	1	3590	37.2857	0	0	50	1	0	0	0	0	0	0	0	0	0	0	0	1	25	2	46.9	315	523893596
33.9616	0	0	31.6158	2	2	2050	34.8571	0	1	47	1	1	1	1	0	0	0	1	1	0	0	0	1	26.1429	3.2	47.9	241	631905883
33.137	0	1	32.3884	2	1	2950	37.8571	0	0	51	0	0	0	0	0	0	0	0	0	0	0	0	1	26.2857	1.8	40.1	252	631905883
28.0356	0	0	28.7109	2	1	2100	34.7143	0	1	46	1	1	0	1	0	0	0	1	0	0	1	0	1	25.4286	3.2	47.3	188	804596658
27.6274	0	0	19.5312	2	1	3350	38.8571	0	0	50	0	0	0	0	0	0	0	0	0	0	0	0	1	25.2857	2.8	42.6	206	804596658
25.4301	0	0	23.4375	2	1	1790	34.2857	0	1	43	1	1	1	1	0	1	0	1	0	0	1	0	1	26.7143	3	37.6	246	840755493
25.8466	0	0	22.8329	1	1	3140	40.2857	0	0	50	0	0	0	0	0	0	0	0	0	0	0	0	1	26.4286	1.2	29	159	840755493
29.1123	0	0	19.7711	2	2	2220	36.4286	0	1	45	1	1	1	1	0	1	0	1	1	0	0	0	1	26.2857	1.8	46	158	876376567
28.3918	0	1	21.1111	2	2	3480	39.2857	0	0	50	0	0	0	0	0	0	0	0	0	0	0	0	1	26.1429	1.9	32.8	244	876376567
32.9205	0	0	25	2	2	1920	34.4286	0	1	46	1	1	1	1	0	0	0	1	0	0	1	0	1	25.1429	2.3	32.4	273	1007465368
32.9726	0	1	26.7698	3	2	3530	39.7143	0	0	51	1	0	0	0	0	0	0	0	0	0	0	0	1	25.5714	2.2	47.1	252	1007465368
27.6247	0	0	22.0317	2	2	1780	34.2857	0	1	41	1	1	1	1	0	1	0	1	0	1	1	0	1	24.8571	2.4	43.9	146	1029863539
27.6466	0	0	20.0288	2	2	2540	37.1429	0	0	48	0	0	0	0	0	0	0	0	0	0	0	0	1	24.5714	2.8	49.8	151	1029863539
33.789	0	1	39.7924	2	2	1630	33.4286	1	1	42	1	1	1	1	0	0	0	1	0	1	0	0	1	27.8571	5	56.2	193	1105176763
33.2959	0	0	19.052	2	2	1700	31.8571	1	1	45	1	1	0	1	0	1	0	0	0	0	0	0	1	27.7143	3.1	45	184	1105176763
26.5589	0	1	30.4688	2	1	1260	32.2857	1	1	38	1	1	1	1	0	1	0	1	0	0	1	0	1	26.2857	3.2	40.4	315	1155321307
27.0055	0	1	31.8878	2	1	2860	36.2857	0	1	50	0	0	0	0	0	0	0	0	0	0	0	0	1	26.2857	2.4	52.7	261	1155321307
33.8767	0	1	25.3444	1	1	3130	37.5714	0	0	50	0	0	0	0	0	0	0	1	1	0	1	0	1	27.1429	2.6	45.8	265	1379732679
33.3781	1	1	24.8358	2	2	1430	32.8571	1	1	39	1	1	1	1	0	1	0	0	0	0	0	0	1	26.8571	3.3	40.7	91	1379732679
30.3808	0	1	23.03	2	2	2750	36.7143	0	1	49	1	0	0	0	0	0	0	1	1	0	0	0	1	26.1429	3.3	43.6	148	1532750793
30.7945	0	0	19.2336	2	1	2300	35.8571	0	1	48	1	0	0	0	0	0	0	0	0	0	0	0	1	26.2857	2.4	46.5	189	1532750793
29.9068	1	1	25.9695	2	2	1200	29.8571	1	1	42	1	1	1	1	0	0	0	1	1	0	0	0	1	27.4286	1.8	38.4	268	1844990703
29.6767	0	0	26.7094	2	1	3930	39.7143	0	0	51	0	0	0	0	0	0	0	0	0	0	0	0	1	27.8571	4.2	39.5	#NULL!	1844990703
33.7699	1	0	37.1094	2	1	4540	35.8571	0	1	51	1	1	0	1	0	0	1	1	0	0	1	0	1	27.4286	2.6	44.4	244	2126066040
33.5863	0	0	19.1327	2	2	2110	37.7143	0	0	48	1	1	1	0	0	1	0	0	0	0	0	0	1	27.2857	2.3	62.4	254	2126066040
28.7534	0	0	30.4688	2	2	1140	30.7143	1	1	36	1	1	1	1	0	1	0	1	0	1	0	0	1	27.2857	3.3	55.7	250	2135079288
28.9836	0	0	28.2284	2	1	2640	36.4286	0	1	48	1	1	0	1	0	0	0	0	0	0	0	0	1	27.2857	3.3	44.8	296	2135079288
